# Supplementary material for: Diketopyrrolopyrrole-based acceptors with multi-arms for organic solar cells
Source: Royal Society of Chemistry journal article supplement (doi:10.1039/c8ra03792b), 2018-01-01
Supplement: c8ra03792b1.pdf [file c8ra03792b1.pdf]

Electronic Supplementary Material (ESI) for Dalton Transactions.

This journal is © The Royal Society of Chemistry 2014

## Supporting information

### Diketopyrrolopyrrole based acceptors with multi-arms for organic solar cells

Po Sun, Xiangzhi Li, Yulong Wang, Haiquan Shan, Jiaju Xu, Changmei Liu, Cong  
Zhang, Fei Chen, Zongxiang Xu,\* Zhi-kuan Chen\* and Wei Huang\*

1. Figure S1.  $^1\text{H}$  NMR( $\text{CDCl}_3$ ) spectra of SBF-4B.
2. Figure S2.  $^1\text{H}$  NMR( $\text{CDCl}_3$ ) spectra of SBF-2B.
3. Figure S3.  $^1\text{H}$  NMR( $\text{CDCl}_3$ ) spectra of DPP-C12.
4. Figure S4.  $^1\text{H}$  NMR( $\text{CDCl}_3$ ) spectra of DPPCHO.
5. Figure S5.  $^1\text{H}$  NMR( $\text{CDCl}_3$ ) spectra of DPPCHO-Br.
6. Figure S6.  $^1\text{H}$  NMR( $\text{CDCl}_3$ ) spectra of DPPDCV-Br.
7. Figure S7.  $^1\text{H}$  NMR( $\text{CDCl}_3$ ) spectra of SBF-4DPPDCV.
8. Figure S8.  $^1\text{H}$  NMR( $\text{CDCl}_3$ ) spectra of SBF-2DPPDCV.
9. Figure S9.  $^1\text{H}$  NMR( $\text{CDCl}_3$ ) spectra of SBF-1DPPDCV.
10. Figure S10.  $^{13}\text{C}$  NMR( $\text{CDCl}_3$ ) spectra of SBF-4DPPDCV.
11. Figure S11.  $^{13}\text{C}$  NMR( $\text{CDCl}_3$ ) spectra of SBF-2DPPDCV.
12. Figure S12.  $^{13}\text{C}$  NMR( $\text{CDCl}_3$ ) spectra of SBF-1DPPDCV.

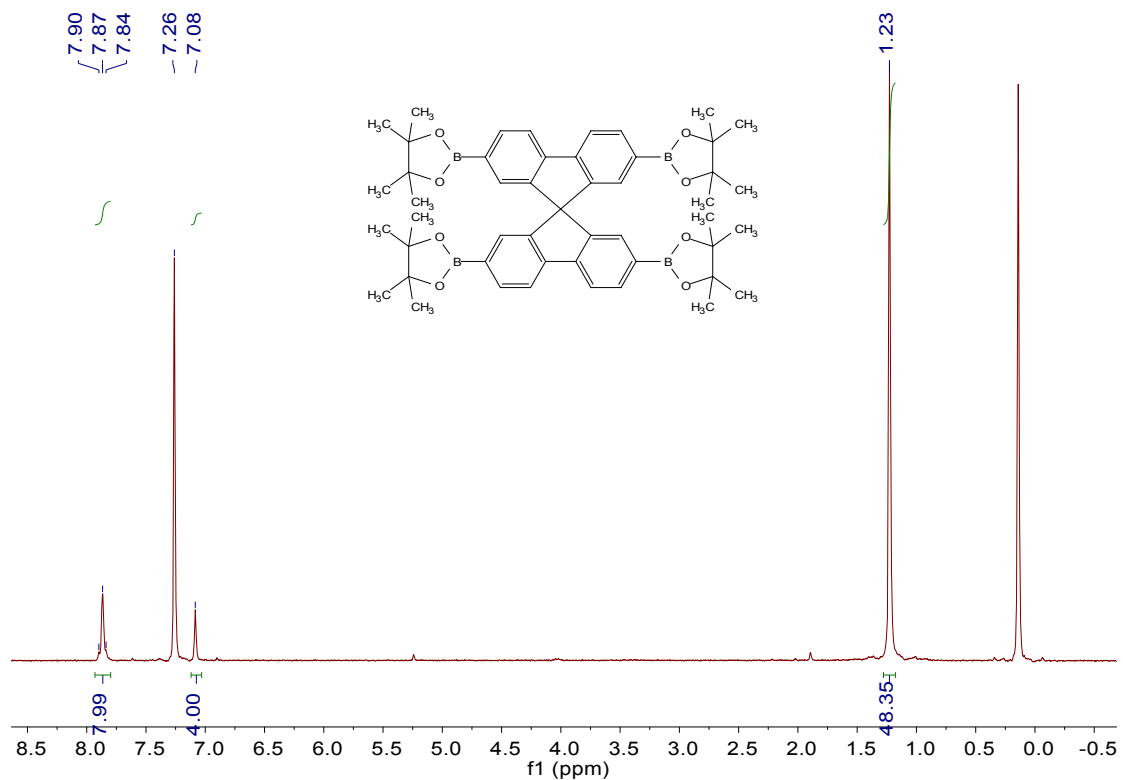

Figure S1.  $^1\text{H}$  NMR( $\text{CDCl}_3$ ) spectrum of SBF-4B.

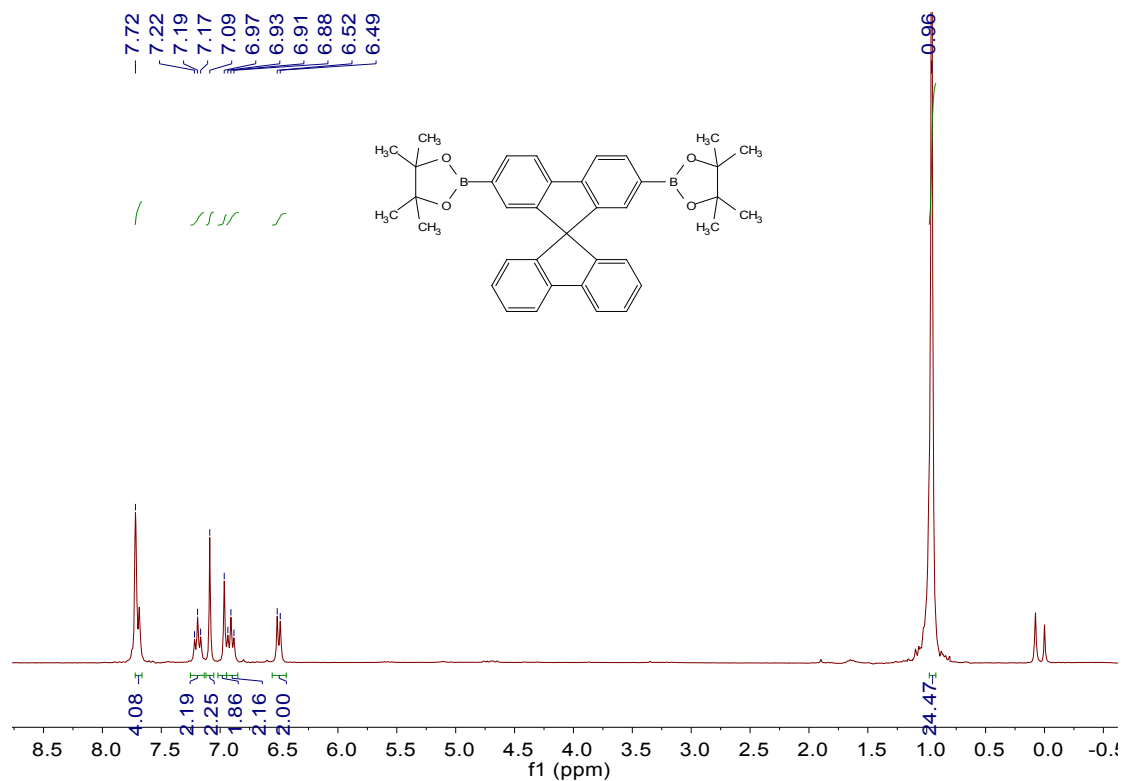

Figure S2.  $^1\text{H}$  NMR( $\text{CDCl}_3$ ) spectrum of SBF-2B.

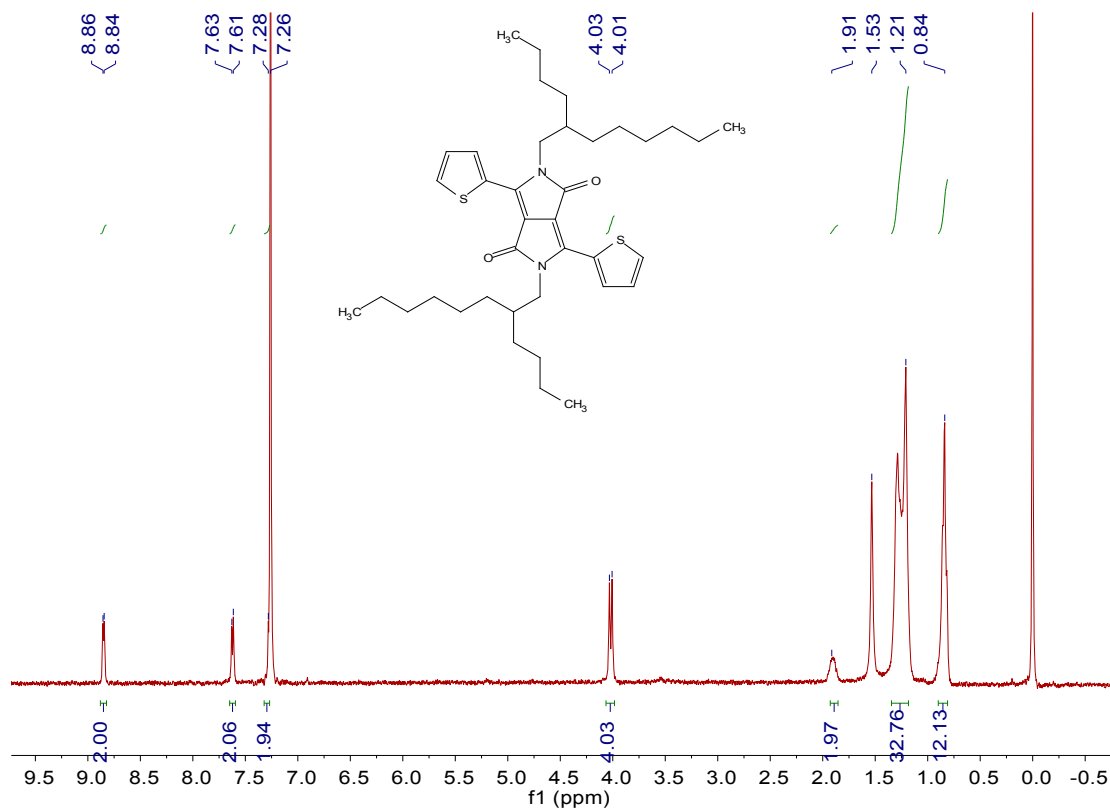

Figure S3.  $^1\text{H}$  NMR( $\text{CDCl}_3$ ) spectrum of DPP-C12.

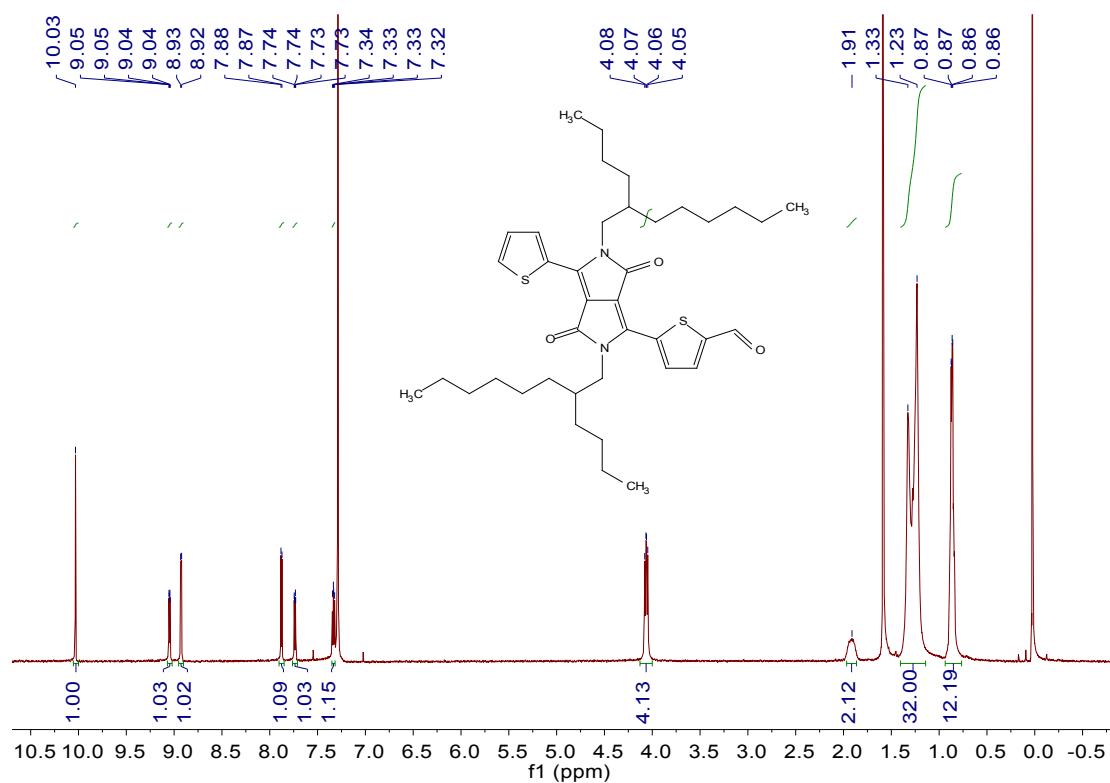

Figure S4.  $^1\text{H}$  NMR( $\text{CDCl}_3$ ) spectrum of DPPCHO.

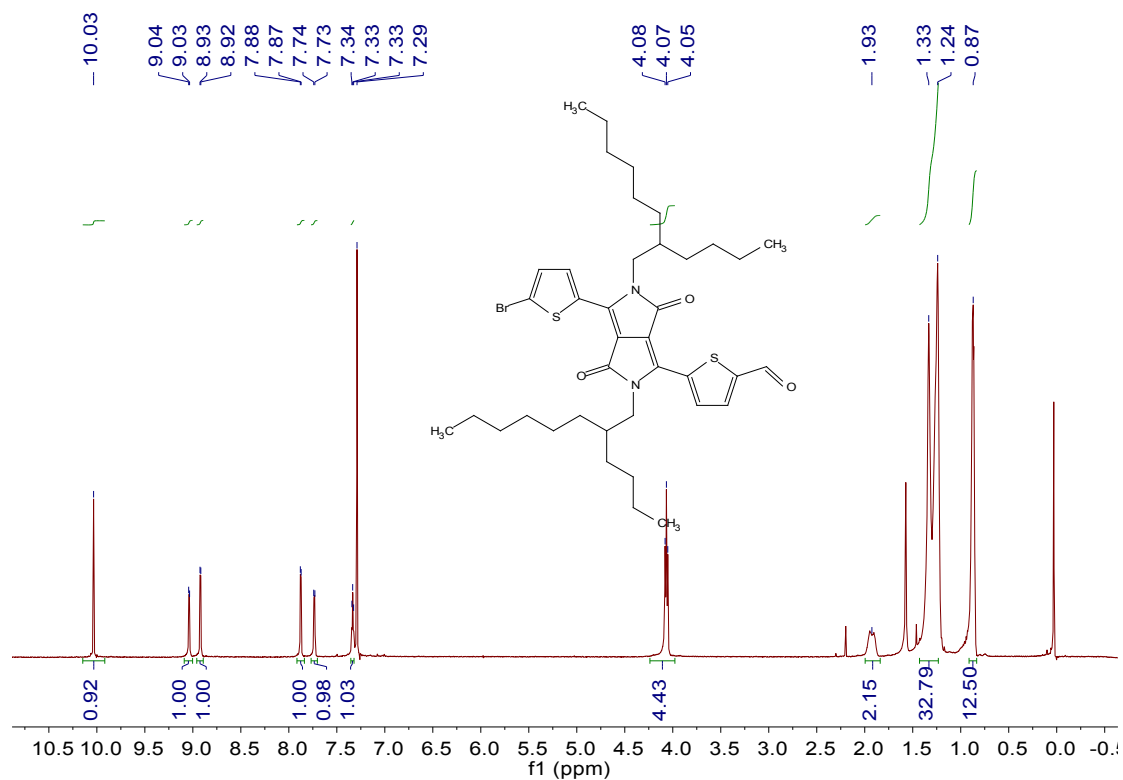

Figure S5.  $^1\text{H}$  NMR( $\text{CDCl}_3$ ) spectrum of DPPCHO-Br.

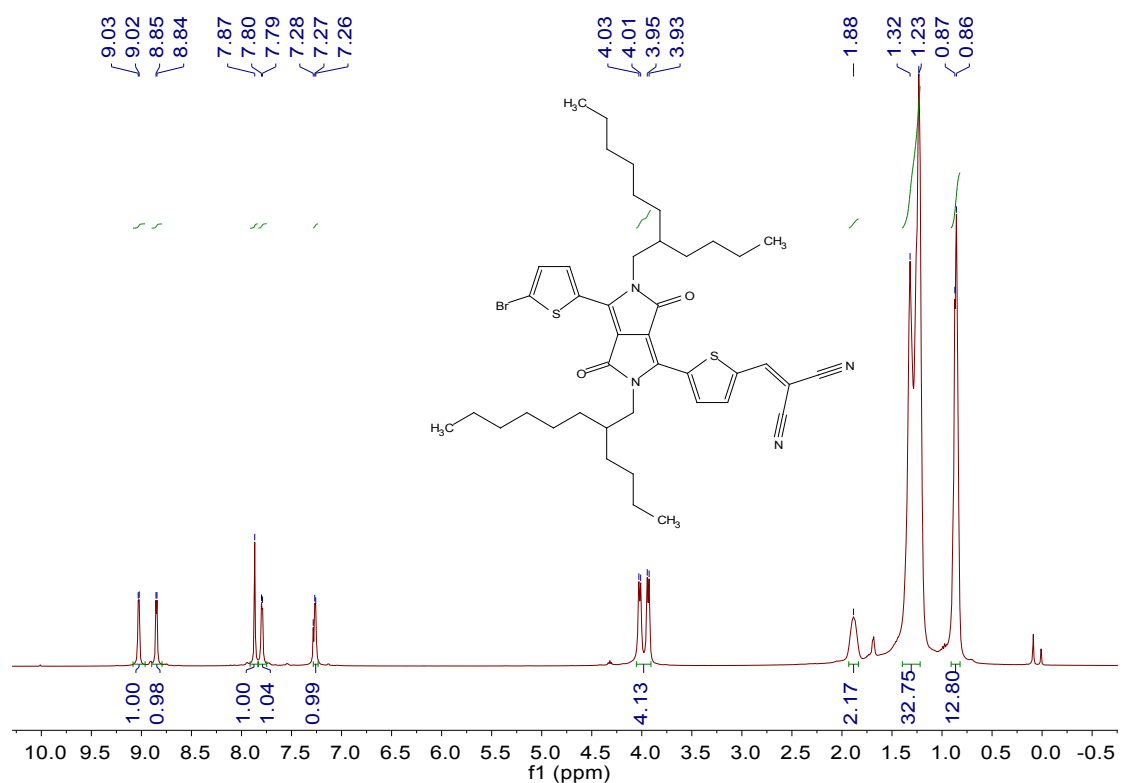

Figure S6.  $^1\text{H}$  NMR( $\text{CDCl}_3$ ) spectrum of DPPDCV-Br.

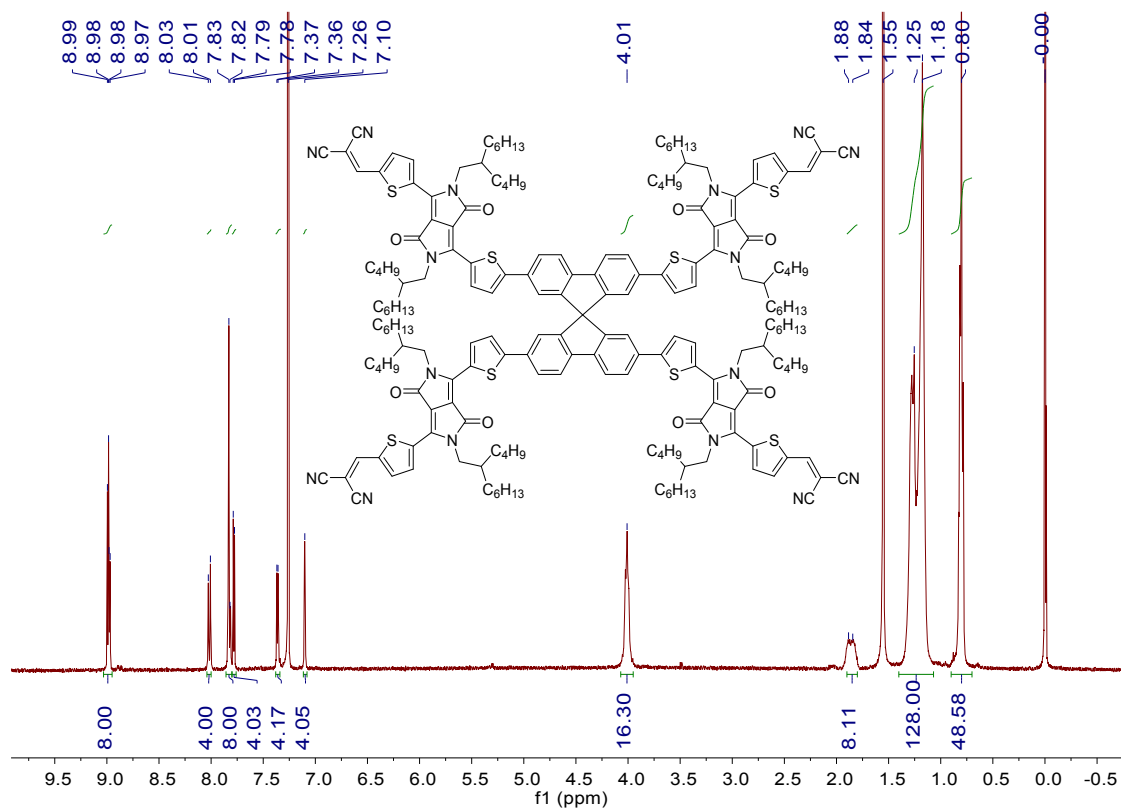

Figure S7.  $^1\text{H}$  NMR( $\text{CDCl}_3$ ) spectrum of SBF-4DPPDCV.

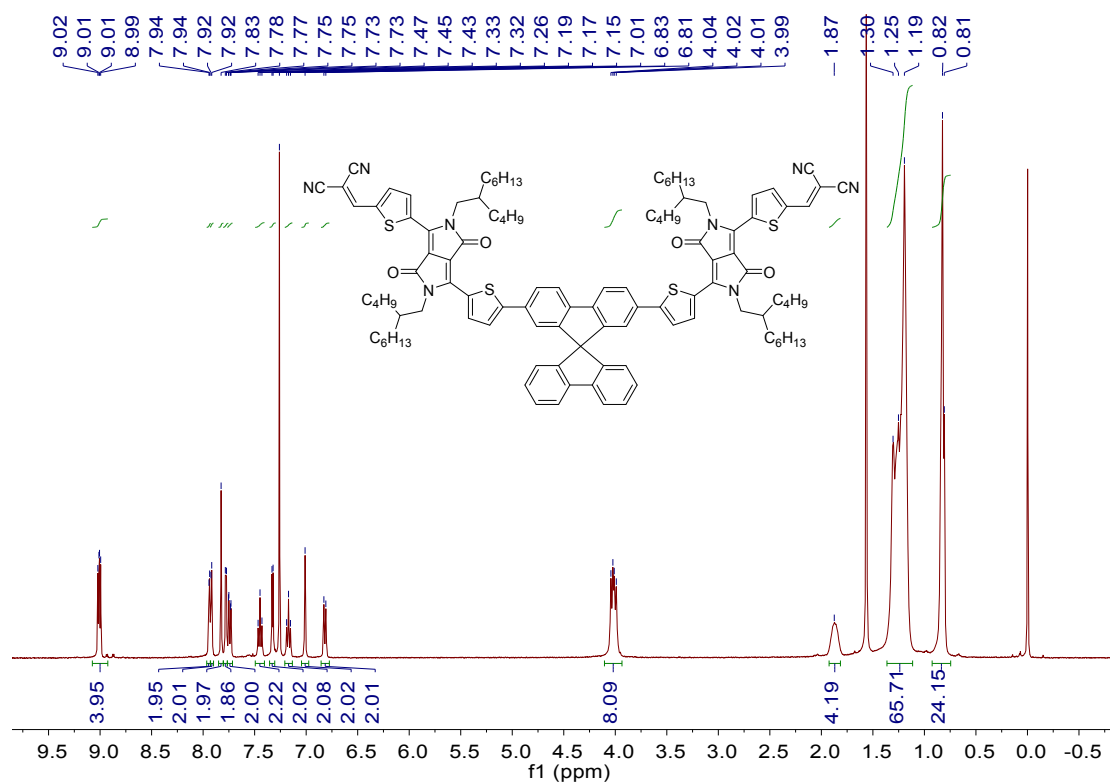

Figure S8.  $^1\text{H}$  NMR( $\text{CDCl}_3$ ) spectrum of SBF-2DPPDCV.

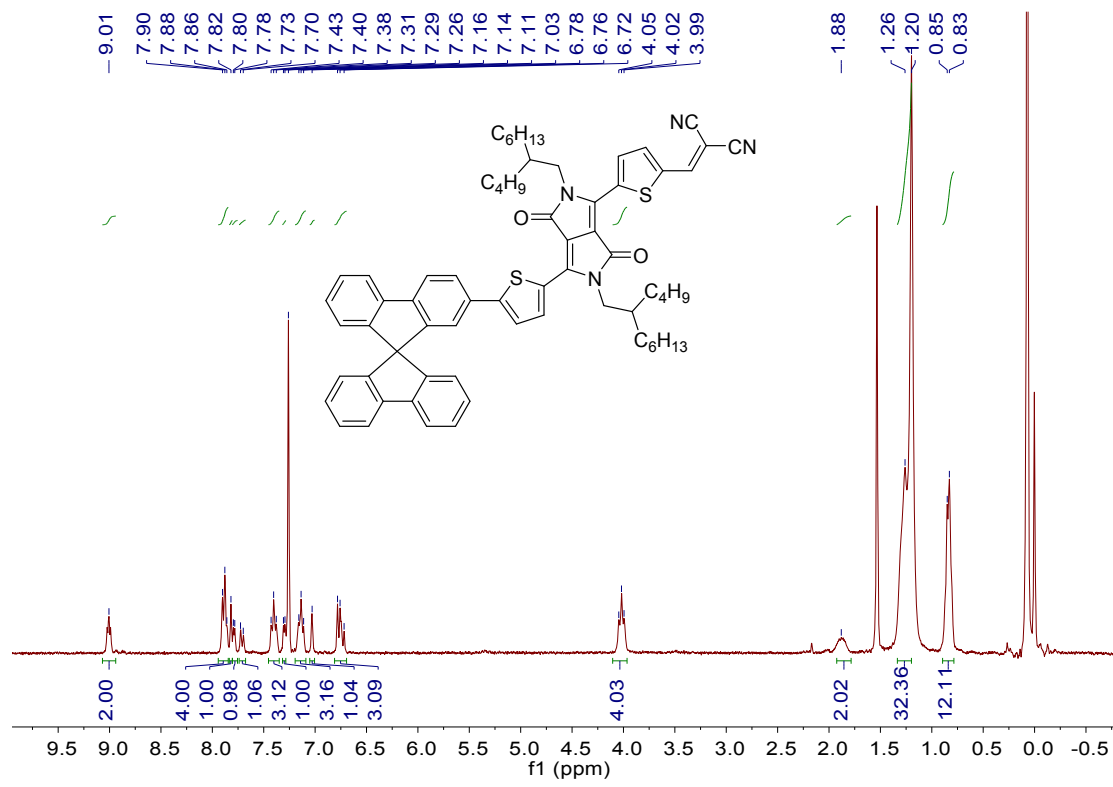

Figure S9. <sup>1</sup>H NMR(CDCl<sub>3</sub>) spectrum of SBF-1DPPDCV.

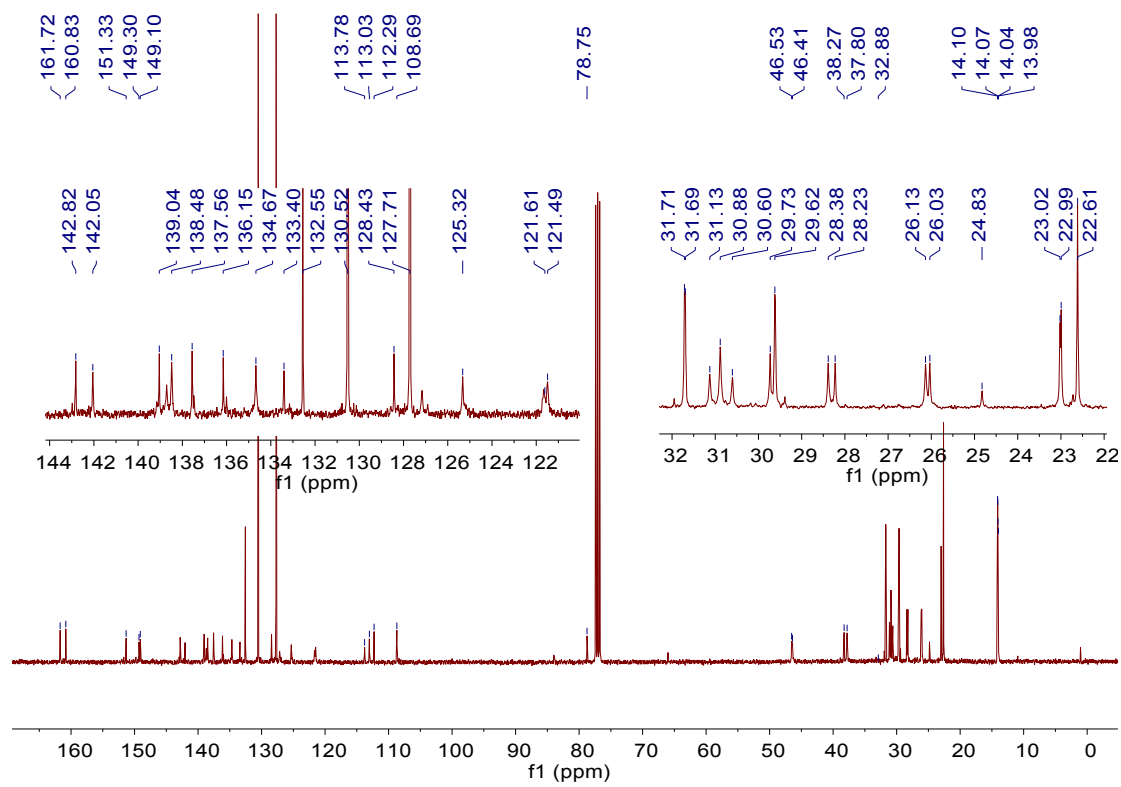

Figure S10.  $^{13}\text{C}$  NMR( $\text{CDCl}_3$ ) spectrum of SBF-4DPPDCV.

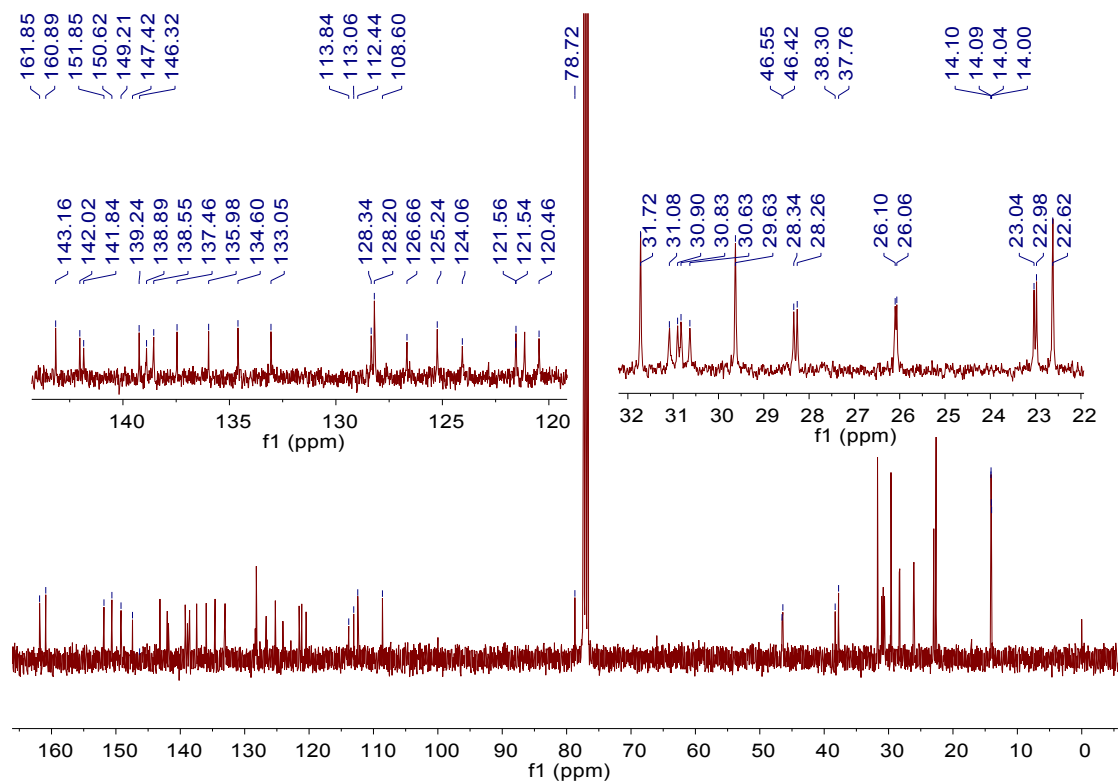

Figure S11.  $^{13}\text{C}$  NMR( $\text{CDCl}_3$ ) spectrum of SBF-2DPPDCV.

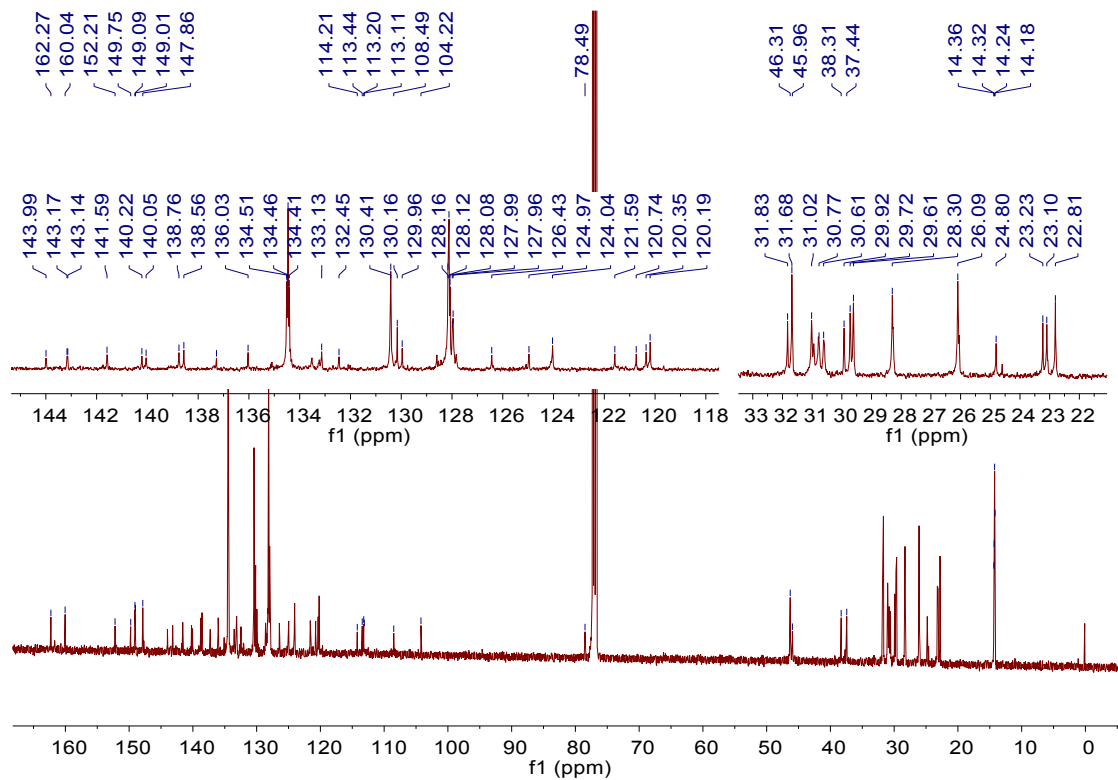

Figure S12.  $^{13}\text{C}$  NMR( $\text{CDCl}_3$ ) spectrum of SBF-1DPPDCV.
